# Supplementary material for: Enantioselective synthesis of 2-methyl indolines by palladium catalysed asymmetric C(sp3)–H activation/cyclisation
Source: Royal Society of Chemistry journal article supplement (doi:10.1039/c1cc14292e), 2011-01-01

## Supporting information

### Enantioselective synthesis of 2-methyl indoline by palladium catalysed asymmetric C(sp<sup>3</sup>)-H activation/cyclisation

Saithalavi Anas, Alex Cordi and Henri B. Kagan\*

*Institut de Chimie Moléculaire et des Matériaux d'Orsay (UMR 8182, CNRS),  
Laboratoire de Catalyse Moléculaire, Université Paris-Sud, 91405 Orsay, France*

## Contents

|                                                            |               |
|------------------------------------------------------------|---------------|
| <b>Experimental.....</b>                                   | <b>S2</b>     |
| <b>Synthesis of starting material.....</b>                 | <b>S3</b>     |
| <b>Optimization reactions.....</b>                         | <b>S3-S4</b>  |
| <b>Characterization data.....</b>                          | <b>S5-S6</b>  |
| <b><sup>1</sup>H &amp; <sup>13</sup>C NMR Spectra.....</b> | <b>S8-S19</b> |
| <b>Chromatogram for compound 2a .....</b>                  | <b>S20</b>    |

## Experimental section

**General:** All reactions were carried out in oven dried glasswares. Progress of the reaction was monitored by Thin Layer Chromatography, which was performed on Merck precoated plates (silica gel. 60 F<sub>254</sub>, 0.25 mm) and was visualized by fluorescence quenching under UV light. Column chromatography was done using 60-120 mesh silica gel and appropriate mixture of pentane and ethyl acetate for elution. The IR spectra were recorded on Perkin-Elmer Spectrum 100 FT-IR spectrometer. <sup>1</sup>H and <sup>13</sup>C NMR spectra were recorded on Bruker FT-NMR spectrometers (360 and 250 MHz respectively) using CDCl<sub>3</sub> as solvent. TMS was used as internal standard and chemical shifts are in δ-scale. High resolution mass spectra were recorded under EI/HRMS (at 5000 resolution) using mass spectrometer. Enantiomeric excesses were determined by HPLC analysis with a Chiralcel OD-H column (*n*-hexane/<sup>i</sup>PrOH 99:1, 1 mL/min, 254 nm, rt) unless specified.

### 1. Representative procedures for the preparation of *N*-alkyl-2-bromoaniline:

#### 1a) Preparation of *N*-isopropyl-2-bromoaniline: Method A<sup>1</sup>

To a solution of 2-bromo aniline (5.8 mmol, 1 g) in dichloroethane (10 mL) were added 2-methoxy propane (11.6 mmol), acetic acid (5.8 mmol) and NaBH<sub>4</sub> (5.8 mmol) under inert atmosphere at room temperature for 16 h. After the reaction, the mixture was neutralized with 1N NaOH. The mixture was extracted with dichloromethane and dried over MgSO<sub>4</sub> and concentrated in *vacuo*. The crude material was purified by column chromatography with pentane to afford the 2-bromo-*N*-isopropylaniline (53% yield).

#### 1b) Preparation of *N*-alkyl-2-bromoaniline: Method B<sup>2</sup>

To a solution of 2-bromo-1-iodobenzene (1 eq.) in DMF were added CuI (20 mol%), *rac*-BINOL (20 mol%), K<sub>3</sub>PO<sub>4</sub> (3 eq.) and corresponding amine (1.5 eq.) under argon. The mixture was stirred at 50 °C for 1 day. The mixture was filtered and diluted with diethylether, dried over MgSO<sub>4</sub> and concentrated in *vacuo*. The crude material was purified by silicagel column chromatography with pentane/ethyl acetate (50:1) to afford the products in 50-60% yield.

#### 2) Preparation of Methyl 2-Bromophenyl(isopropyl)carbamate **1a**<sup>3</sup>

A mixture of 2-bromo-*N*-isopropylaniline (1.0 g, 4.5 mmol) in methyl chloroformate (20 mL) was heated under reflux for 6 h. The mixture was poured into water and extracted with chloroform. The organic layer was, dried over MgSO<sub>4</sub>, and concentrated in *vacuo*. The crude material was purified by silicagel column chromatography with pentane/ethyl acetate (30:1) to afford the methyl 2-bromo phenyl(isopropyl) carbamate **1a** in quantitative yield.

1. T. J. Reddy, M. Leclair, M. Proulx, *Synlett* **2005**, 583
2. D. Jiang, H. Fu, Y. Jiang, Y. Zhao *J. Org. Chem.*, **2007**, 72, 672
3. T. Watanabe, S. Oishi, N. Fujii, H. Ohno, *Org. Lett.* 2008, **10**, 1759

## Optimization reactions

### 1) Initial Ligand screening studies

These reactions were performed with 0.2 mmol of the substrate **1a** in presence of 5 mol% Pd(OAc)<sub>2</sub>, 10 mol% chiral ligand, 1.4 eq. Cs<sub>2</sub>CO<sub>3</sub> and 0.5 eq. pivalic acid in 2 mL xylene at 140 °C under argon atmosphere. Better results in terms of yields as well as *ee*'s were obtained with (*S,S*)-DIOP and (*R,R*)-Me-DUPHOS as ligands. The results are presented in table 4.

Table 3

| Entry | Ligand (L*)                         | Yield% <sup>b</sup> | ee% <sup>b</sup> |
|-------|-------------------------------------|---------------------|------------------|
| 1     | PCy <sub>3</sub> , HBF <sub>4</sub> | 100(80°)            | -                |
| 2     | ( <i>R</i> )-BINAP                  | 26                  | 0                |
| 3     | (2 <i>S</i> ,5 <i>S</i> )-BDPP      | 70                  | 5                |
| 4     | Trost ligand <sup>d</sup>           | 5                   | 8                |
| 5     | JOSIPHOS                            | 23                  | 4                |
| 6     | ( <i>S,S</i> )-DIOP                 | 100(92°)            | 43               |
| 7     | ( <i>R,R</i> )-Me-DUPHOS            | 100(98°)            | 90               |
| 8     | ( <i>R,R</i> )-iPr-DUPHOS           | 16                  | 2                |
| 9     | ( <i>R</i> )-PHANEPHOS              | 78                  | 4                |
| 10    | ( <i>R,R</i> )-CHIRAPHOS            | 77                  | 27               |
| 11    | ( <i>S,S</i> )-BPPM                 | 100                 | 2                |
| 12    | Phosphoramidate <sup>e</sup>        | 23                  | 3                |
| 13    | (-)-Sparteine                       | 8                   | 0                |
| 14    | ( <i>R,R</i> )-TsDPEN               | No reaction         | -                |

  

(*R,R*)-CHIRAPHOS

(*S,S*)-BDPP

(*S,S*)-DIOP

(*R,R*)-Me-DUPHOS

<sup>d</sup>(*R,R*)-DACH phenyl Trost ligand

(*R*)-PHANEPHOS

(*R,R*)-TsDPEN

(*S,S*)-BPPM

Phosphoramidate

<sup>a</sup> Procedure: 0.2 mmol of **1a** is mixed with the reagents in xylene at 140 °C and keep stirring for 16 h.

<sup>b</sup> Determined by HPLC analysis.

<sup>c</sup> Isolated yield

## 2) Optimization reaction for a suitable catalyst/ligand ratio

These reactions were performed with 0.2 mmol of the substrate **1a** in presence of 5 mol% Pd(OAc)<sub>2</sub>, 2.5-10 mol% (*R,R*)-Me-DUPHOS, 1.4 eq. Cs<sub>2</sub>CO<sub>3</sub> and 0.5 eq. pivalic acid in 2 mL xylene at 140 °C under argon atmosphere and keep stirring for 16 h. The results are presented in table 4.

**Table 4**

| Entry | Catalyst (mol%) | Ligand (mol%) | Trial 1 <sup>a</sup> |     | Trial 2 <sup>a</sup> |     |
|-------|-----------------|---------------|----------------------|-----|----------------------|-----|
|       |                 |               | Yield%               | ee% | Yield%               | ee% |
| 1     | 5               | 5             | 77                   | 17  | trace                |     |
| 2     | 5               | 7.5           | 25                   | 44  | 15                   | 64  |
| 3     | 5               | 10            | 55                   | 82  | 40                   | 63  |
| 4     | 5               | 2.5           | 87                   | 19  | 72                   | 21  |

<sup>a</sup>Yield and ee calculated by HPLC analysis

## 3) Optimization studies with different modes of addition of the reagents

These reactions were performed with 0.2 mmol of the substrate **1a** in presence of 5 mol% Pd(OAc)<sub>2</sub>, 10 mol% (*S,S*)-DIOP and/or (*R,R*)-Me-DUPHOS, 1.4 eq. Cs<sub>2</sub>CO<sub>3</sub> and 0.5 eq. pivalic acid in 2 mL xylene at 140 °C in the **absence of argon** and keep stirring for 16 h. We monitored the progress of the reaction by means of HPLC analysis with time. The results are presented in table 5.

**Table 5**

| Entry | Mode of addition of substrates                                                                                                                                         | Time (hour) | (S,S)-DIOP     |                | (R,R) MeDuphos |
|-------|------------------------------------------------------------------------------------------------------------------------------------------------------------------------|-------------|----------------|----------------|----------------|
|       |                                                                                                                                                                        |             | Yield(ee)%     |                | Yield(ee)%     |
|       |                                                                                                                                                                        |             | trial 1        | trial 2        |                |
| 1     | <b>Substrate</b> was dissolved in xylene <b>at 140 °C</b> . After 5 min catalyst & ligand were added together. Then additive & base were added                         | 0.1         | 4(89)          | 5(87)          | 8(63)          |
|       |                                                                                                                                                                        | 1           | 98(45)         | 25(42)         | 17(47)         |
|       |                                                                                                                                                                        | 16          | 99(45)         | 50(41)         | 22(45)         |
| 2     | Catalyst & ligand were premixed in xylene <b>at rt</b> and kept at 140 °C. Followed by addition of the substrate, additive and base                                    | 0.1         | 3(72)          |                |                |
|       |                                                                                                                                                                        | 1           | 16(41)         |                |                |
|       |                                                                                                                                                                        | 16          | 25(35)         |                |                |
| 3     | Catalyst & ligand were premixed in xylene <b>at rt</b> and kept at 140 °C. Followed by added the additive, base and <b>finally</b> the substrate                       | 0.1         | 3(99)          |                |                |
|       |                                                                                                                                                                        | 1           | 4(93)          |                |                |
|       |                                                                                                                                                                        | 16          | 4(90)          |                |                |
| 4     | Substrate and ligand were premixed in xylene at 140 °C. After 5 min additive and base were added then <b>finally the catalyst</b>                                      | 0.1         | 3(98)          | 3(94)          | 5(93)          |
|       |                                                                                                                                                                        | 1           | 70(49)         | 70(48)         | 11(93)         |
|       |                                                                                                                                                                        | 16          | 97(44)         | >99(47)        | 24(75)         |
| 5     | Catalyst & ligand were premixed in xylene <b>at rt</b> . Followed by added the additive, base and finally the substrate. <b>gradually increased</b> the temp to 140 °C | 0.1         | no reaction    |                |                |
|       |                                                                                                                                                                        | 1           | trace          |                |                |
|       |                                                                                                                                                                        | 16          | 5(65)          |                |                |
| 6     | All reagents were premixed with xylene at rt and <b>stirred for 1 min at rt</b> . Then suddenly put the reaction mixture at 140 °C.                                    | 0.1         | 5(53)          | 4(50)          | 4(96)          |
|       |                                                                                                                                                                        | 1           | <b>93(48)</b>  | <b>90(44)</b>  | <b>95(94)</b>  |
|       |                                                                                                                                                                        | 2           | <b>100(47)</b> | <b>100(43)</b> | <b>100(93)</b> |

**Note:** We initially carried out the reactions with the cheaper ligand (S,S)-DIOP and the better results were re-checked again for reproducibility of the result which we obtained earlier with (R,R)-Me-DUPHOS. The condition which gave the consistent result with both (S,S)-DIOP and (R,R)-Me-DUPHOS (entry 6,) was selected as the optimized procedure. (ref 14 in the article)

**Representative procedure for the synthesis of 2a from 1a:** 2-bromo-N-isopropylaniline derivative **1a** (55 mg, 0.20 mmol), Pd(OAc)<sub>2</sub> (2.3 mg, 5 mol %), (R,R)-Me-DUPHOS (6.8 mg, 10 mol %), Cs<sub>2</sub>CO<sub>3</sub> (84 mg, 0.28 mmol) and *t*-BuCO<sub>2</sub>H (9 mg, 0.10 mmol) were taken in a 10 mL RB flask equipped with a reflux condenser. To this, xylene (2.0 mL) was added in an open atmosphere and mixed well under stirring at room temperature. The reaction mixture was stirred further for 2 h at 140 °C. After cooling, the reaction mixture was concentrated in *vacuo*. The crude material was purified by silicagel chromatography with pentane/ethyl acetate (30:1) to afford the indoline **2a** (40 mg, 97%, 93% *ee*).

#### Scale-up reaction with (S,S)-DIOP

The scale up reaction using substrate **1a** and (S,S)-DIOP as ligand also gave substantially good results. When the reaction was carried out under optimized procedure with 1 g of the substrate

**1a** in presence of 5 mol% Pd(OAc)<sub>2</sub>, 10 mol% (*S,S*)-DIOP, 1.4 eq. Cs<sub>2</sub>CO<sub>3</sub> and 0.5 eq. pivalic acid at 140 °C for 2 h, the product **2a** was isolated in 95% yield and 34% *ee*.

### Characterization data for compounds **2a-2d**, **2f** and **2g**

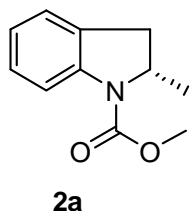

Following the general procedure, **2a** was isolated as a light yellow oil:  $[\alpha]_D^{20} +48.3$  (*c* 0.8, CH<sub>2</sub>Cl<sub>2</sub>); IR(neat) cm<sup>-1</sup>: 3422, 3019, 2957, 1698, 1603, 1486, 1445, 1393, 1288, 1265, 1216, 1140, 1062, 754, 668. <sup>1</sup>HNMR (360 MHz, CDCl<sub>3</sub>): 7.82(brs, 1H), 7.25-7.17(m, 2H), 7.0(t, 1H), 4.58(brs, 1H), 3.88(s, 3H), 3.40 (dd, 1H), 2.66(d, 1H), 1.32(d, 3H). <sup>13</sup>CNMR (250 MHz, CDCl<sub>3</sub>): 153.6, 141.3, 130.1, 127.8, 125.1, 122.7, 115.3, 55.5, 52.6, 36.1, 21.3. HRMS (EI) exact mass calculated for C<sub>11</sub>H<sub>13</sub>NO<sub>2</sub> [M+Na]<sup>+</sup> 214.0845, found 214.0844. The enantiomers were separated on Chiralcel OJ-H column (1% IPA/hexane, 1 mL/min): 254 nm, *rt* = 9.3 (3.5%), 10.3 (96.5%).

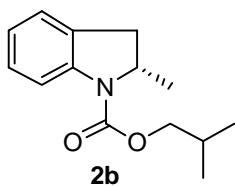

Following the general procedure, **2b** was isolated as a viscous oil; IR(neat) cm<sup>-1</sup>: 3457, 3019, 2963, 2400, 1643, 1486, 1261, 1215, 1110, 929, 755, 669. <sup>1</sup>HNMR (360 MHz, CDCl<sub>3</sub>): 7.74(d, 1H), 7.57-7.54(m, 1H), 7.24-7.17(m, 1H), 6.99(t, 1H), 4.60(brs, 1H), 4.05(d, 2H), 3.40(dd, 1H), 2.66(d, 1H), 2.10-2.04(m, 1H), 1.35-1.28(m, 6H), 1.03(d, 3H). <sup>13</sup>CNMR (250 MHz, CDCl<sub>3</sub>): 154.7, 141.6, 131.0, 128.1, 124.7, 122.0, 115.6, 56.0, 52.8, 35.4, 23.0, 20.1, 13.2, 13.0. HRMS (EI) exact mass calculated for C<sub>14</sub>H<sub>19</sub>NO<sub>2</sub> [M+Na]<sup>+</sup> 256.1306, found 256.1313. The enantiomers were separated on the Chiralcel OJ-H column (1% IPA/hexane, 1 mL/min): 254 nm, *rt* = 7.3 (22.5%), 7.6 (77.5%).

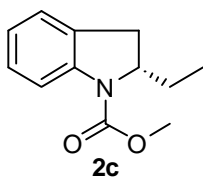

Following the general procedure, **2c** was isolated as a colourless oil:  $[\alpha]_D^{20} -27.7$  (*c* 0.065, CHCl<sub>3</sub>); IR(neat) cm<sup>-1</sup>: 3433, 3019, 2967, 1694, 1645, 1486, 1445, 1395, 1289, 1265, 1216, 1137, 1062, 757, 668. <sup>1</sup>HNMR (360 MHz, CDCl<sub>3</sub>): 7.75(brs, 1H), 7.23-7.01(m, 2H), 6.99(t, 1H), 4.42(m, 1H), 3.88(s, 3H), 3.32(dd, 1H), 2.80(d, 1H), 1.81(m, 1H), 1.64-1.57(m, 1H), 0.92(t, 3H). <sup>13</sup>CNMR (250 MHz, CDCl<sub>3</sub>): 154.1, 141.7, 130.3, 127.9, 124.6, 123.0, 115.5, 59.8, 52.4, 33.6, 27.8, 10.1. LRMS (FAB) exact mass calculated for C<sub>12</sub>H<sub>15</sub>NO<sub>2</sub> [M]<sup>+</sup> 205.1503, found 205.16. The enantiomers were separated on the Chiralcel OJ-H column (1% IPA/hexane, 1 mL/min): 254 nm, *rt* = 7.7 (61.5%), 8.8 (38.5%).

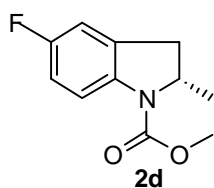

Following the general procedure, **2d** was isolated as a pale yellow oil:  $[\alpha]_D^{20}$  -21.5 (*c* 0.2, CHCl<sub>3</sub>); IR(neat) cm<sup>-1</sup>: 3017, 2950, 1696, 1612, 1487, 1389, 1258, 1215, 1126, 1098, 1064, 815, 753, 665. <sup>1</sup>HNMR (360 MHz, CDCl<sub>3</sub>): 7.76 (br, 1H), 6.91-6.86(m,2H), 4.58 (brs, 1H), 3.85(s, 3H), 3.36(ddd, 1H), 2.63(d, 1H), 1.30(d, 3H). <sup>13</sup>CNMR (250 MHz, CDCl<sub>3</sub>): 157.8, 153.6, 138.1, 130.7, 126.2, 119.6, 113.8, 62.7, 52.5, 44.9, 25.9. LRMS (FAB) exact mass calculated for C<sub>12</sub>H<sub>15</sub>FNO<sub>2</sub> [M]<sup>+</sup> 224.1087, found 224.19. The enantiomers were separated on the Chiralcel OJ-H column (1% IPA/hexane, 1 mL/min): 254 nm, rt = 11.5 (7.5%), 13.1 (92.5%).

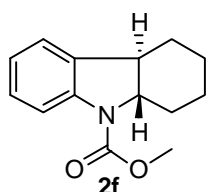

Following the general procedure, **2f** was isolated as a pale yellow oil; IR (neat) cm<sup>-1</sup>: 3435, 3020, 2686, 2401, 1643, 1524, 1422, 1265, 1216, 928, 896, 763, 669. <sup>1</sup>HNMR (360 MHz, CDCl<sub>3</sub>): 7.75(d, 1H), 7.22(t, 1H), 7.13(d, 1H), 6.99(t, 1H), 3.86(s, 3H), 3.44 (ddd, 1H), 2.90(dd, 1H), 2.74(m, 1H), 2.36(m, 1H), 1.95-1.91(m, 2H), 1.49-1.43(m, 2H), 1.22-1.10(m, 2H). <sup>13</sup>C NMR (300 MHz, CDCl<sub>3</sub>): 155.5, 142.7, 133.4, 127.5, 122.6, 120.8, 115.1, 70.1, 52.8, 48.5, 31.9, 28.3, 26.1, 25.2. LRMS (FAB) exact mass calculated for C<sub>14</sub>H<sub>17</sub>NO<sub>2</sub> [M+1]<sup>+</sup> 232.1259, found 232.13. The enantiomers were separated on the IB column (1% IPA/hexane, 1 mL/min): 254 nm, rt = 12.5 (27%), 13.3 (73%).

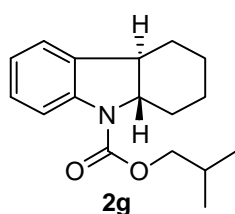

Following the general procedure, **2g** was isolated as a colorless oil:  $[\alpha]_D^{20}$  +3.7 (*c* 0.16, CHCl<sub>3</sub>); IR(neat) cm<sup>-1</sup>: 3435, 3019, 2932, 2962, 1777, 1694, 1477, 1460, 1412, 1332, 1263, 1216, 1115, 1040, 757, 669. <sup>1</sup>HNMR (360 MHz, CDCl<sub>3</sub>): 7.79 (d, 1H), 7.24-7.12(m, 2H), 7.01(t, 1H), 4.14-3.93(m, 2H), 3.45(ddd, 1H), 2.98-2.93(m, 1H), 2.75-2.71(m, 1H), 2.37(m, 1H), 2.14-2.01(m, 2H), 1.32-1.20(m, 4H), 0.99-0.88 (m, 7H). <sup>13</sup>CNMR (250 MHz, CDCl<sub>3</sub>): 154.7, 141.7, 131.9, 127.8, 123.1, 120.5, 114.6, 68.3, 54.9, 47.4, 33.0, 28.7, 25.2, 24.4, 20.7, 14.1, 13.2. HRMS (EI) exact mass calculated for C<sub>17</sub>H<sub>23</sub>NO<sub>2</sub> [M+1]<sup>+</sup> 274.1801, found 274.1807. The enantiomers were separated on the Chiralcel OD-H column (1% IPA/hexane, 0.3 mL/min): 254 nm, rt = 18.1 (21%), 19.4 (79%).

$^1\text{H}$  &  $^{13}\text{C}$  NMR Spectra of compounds 2a-f

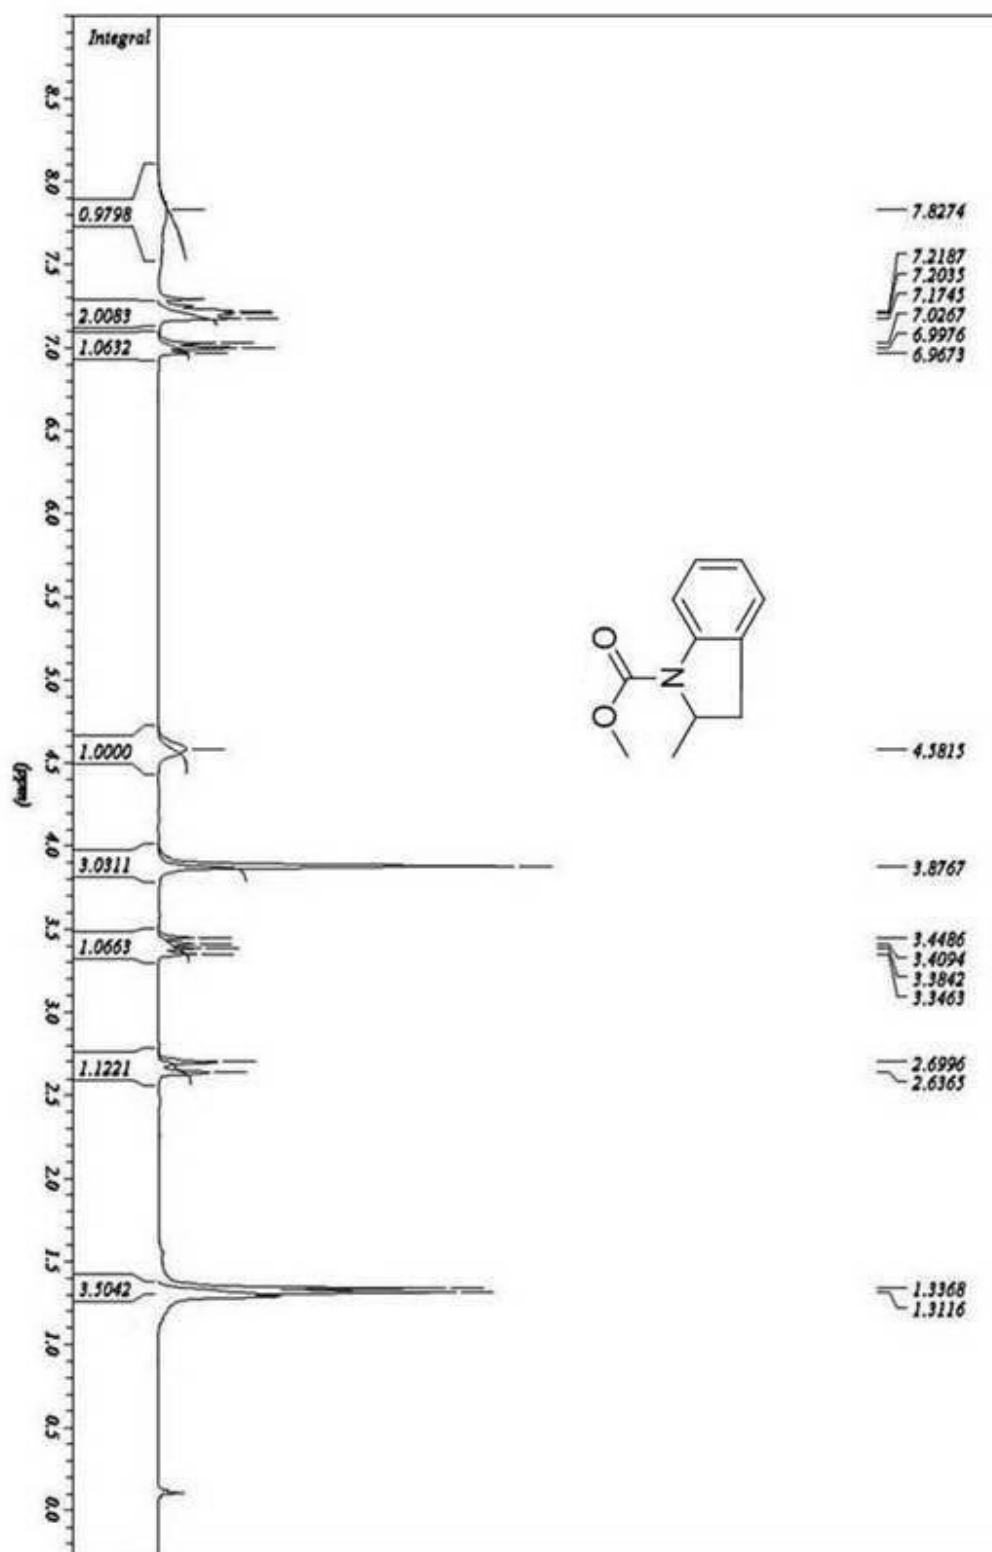



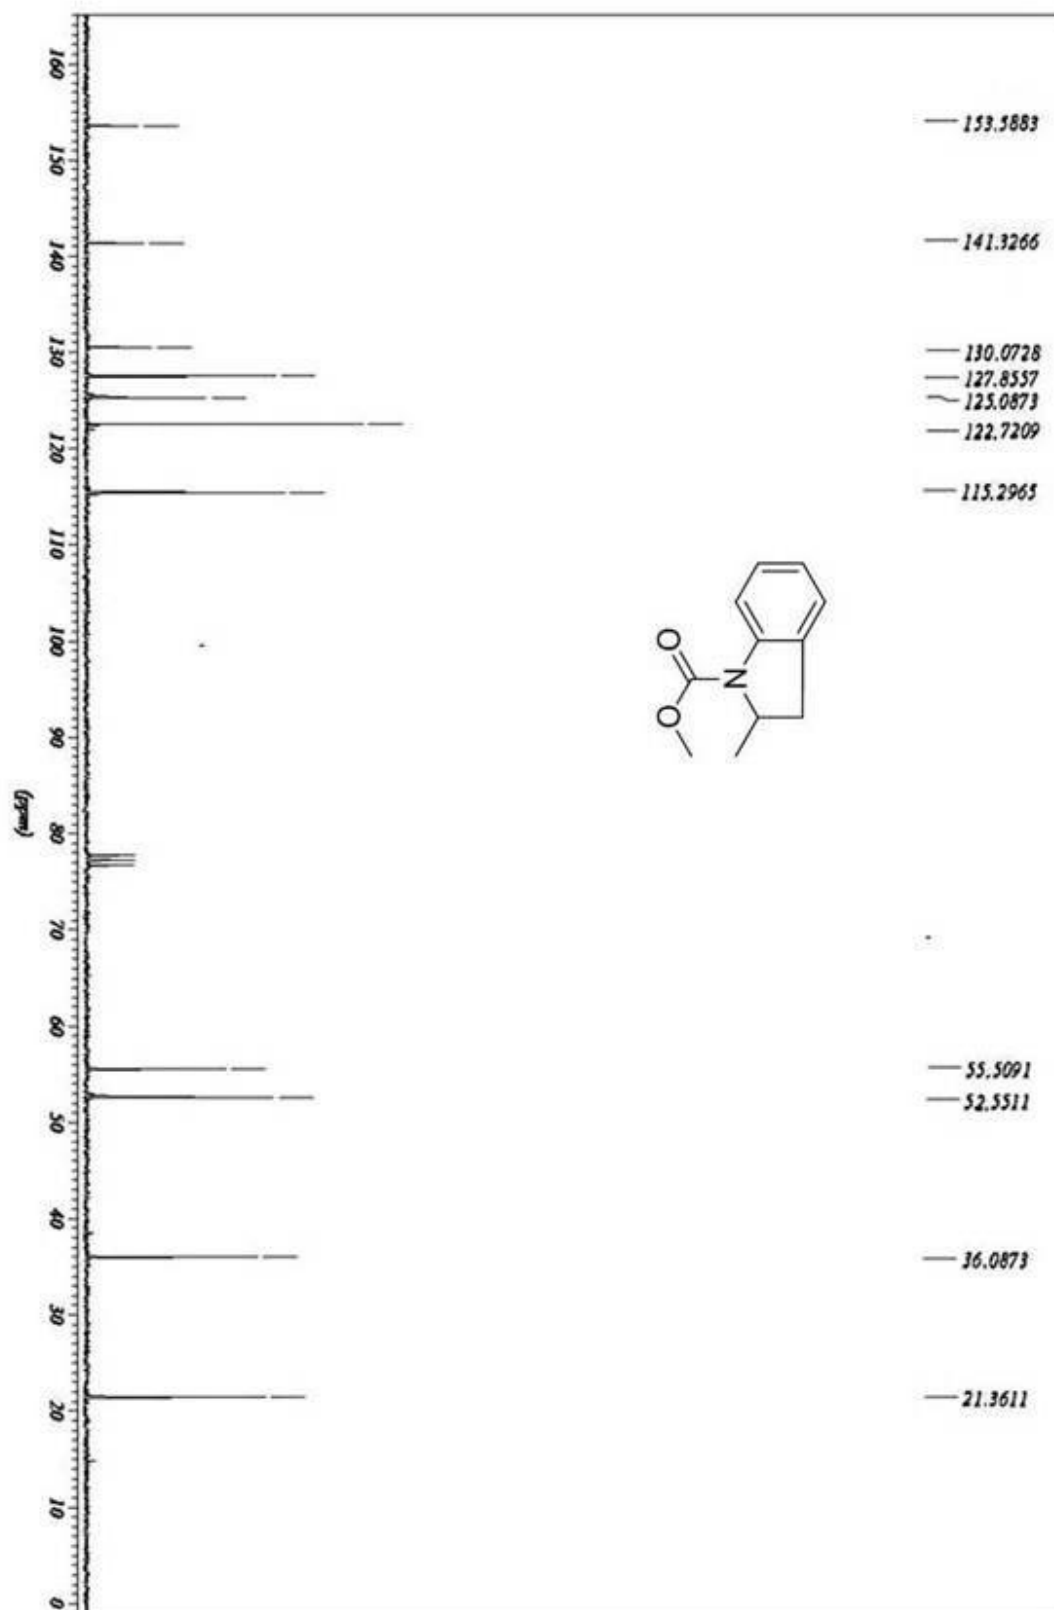

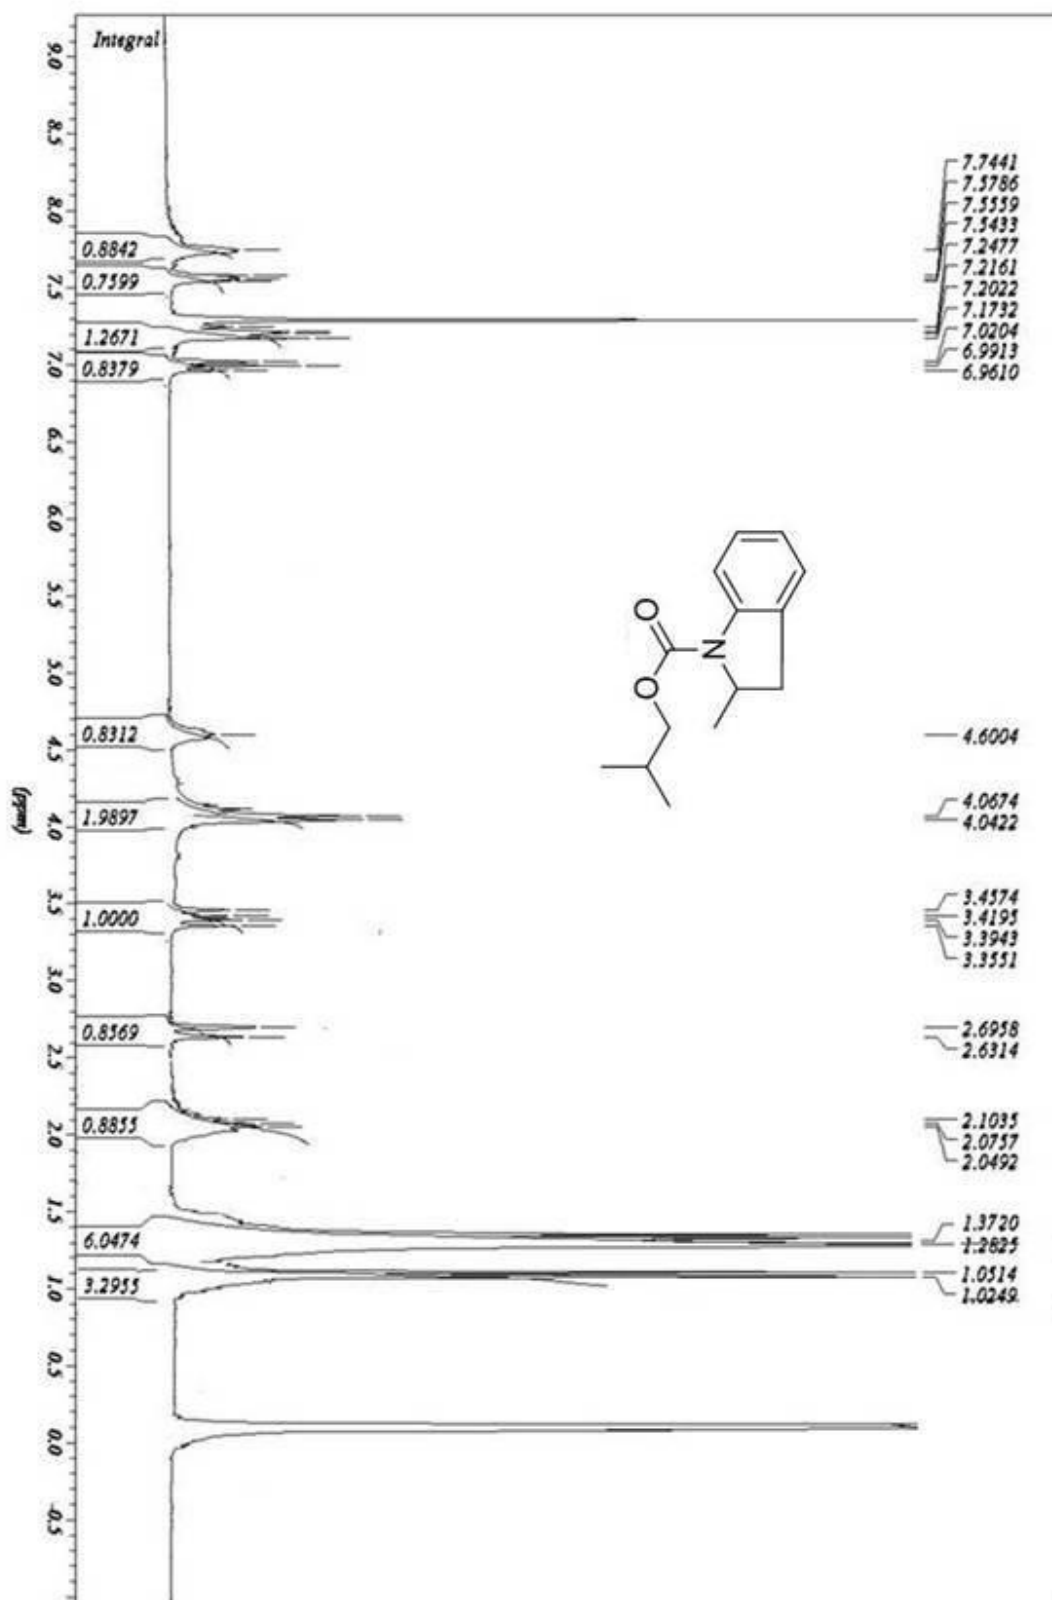

SAS-233-1

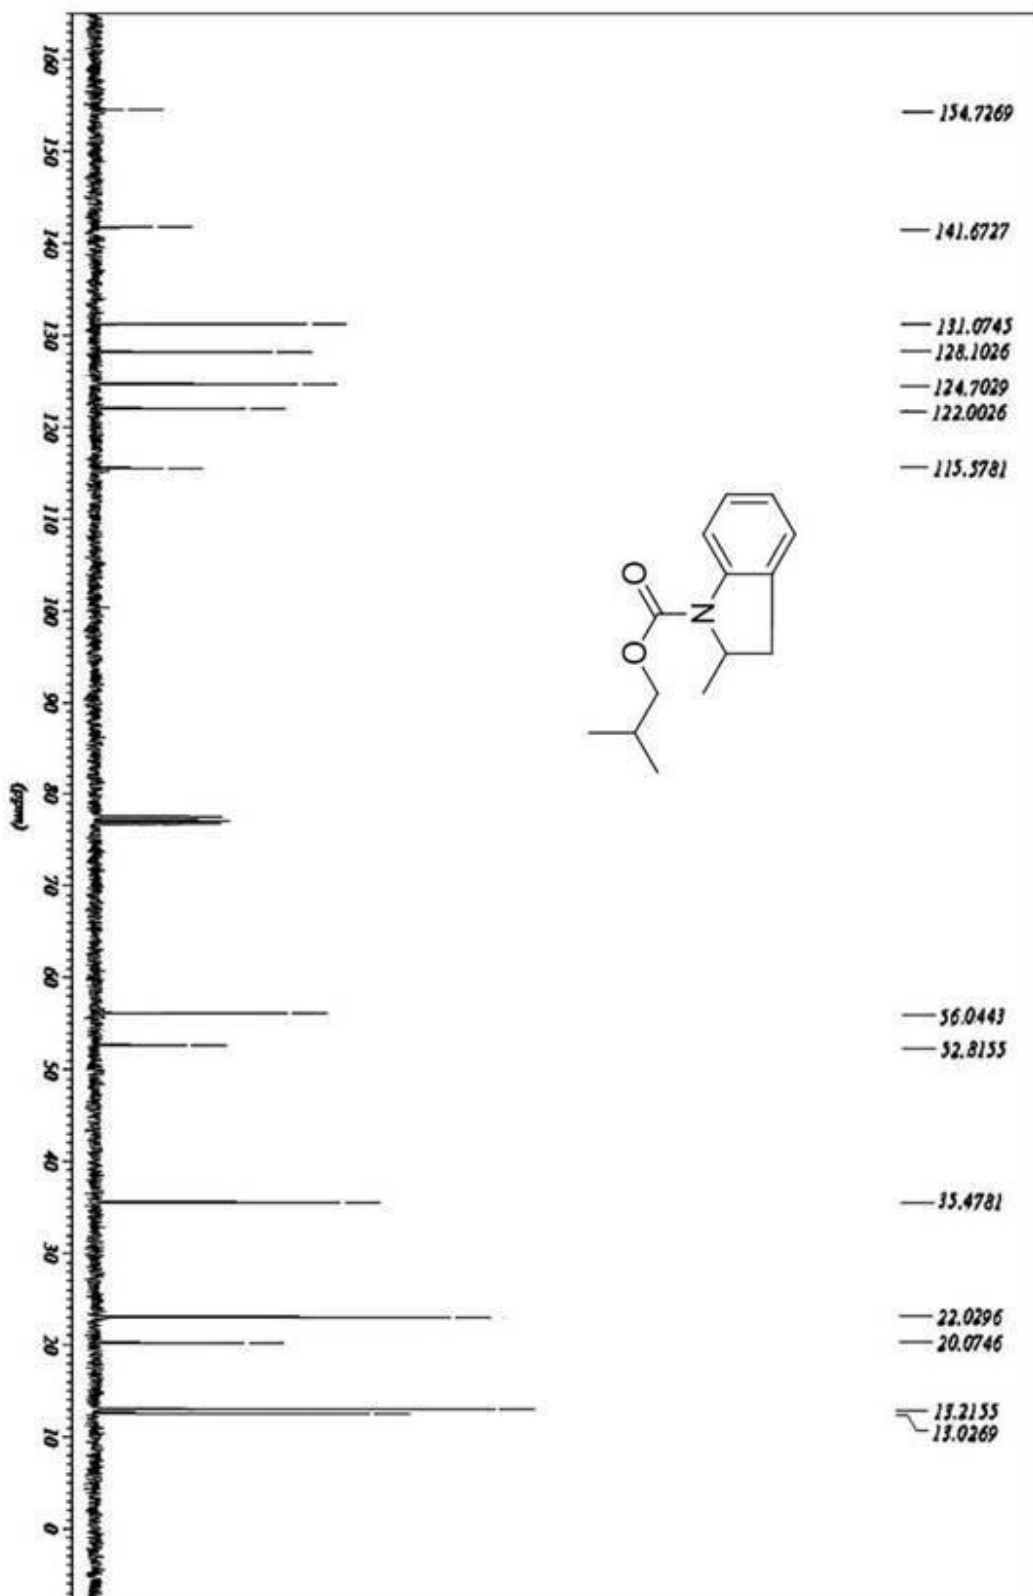

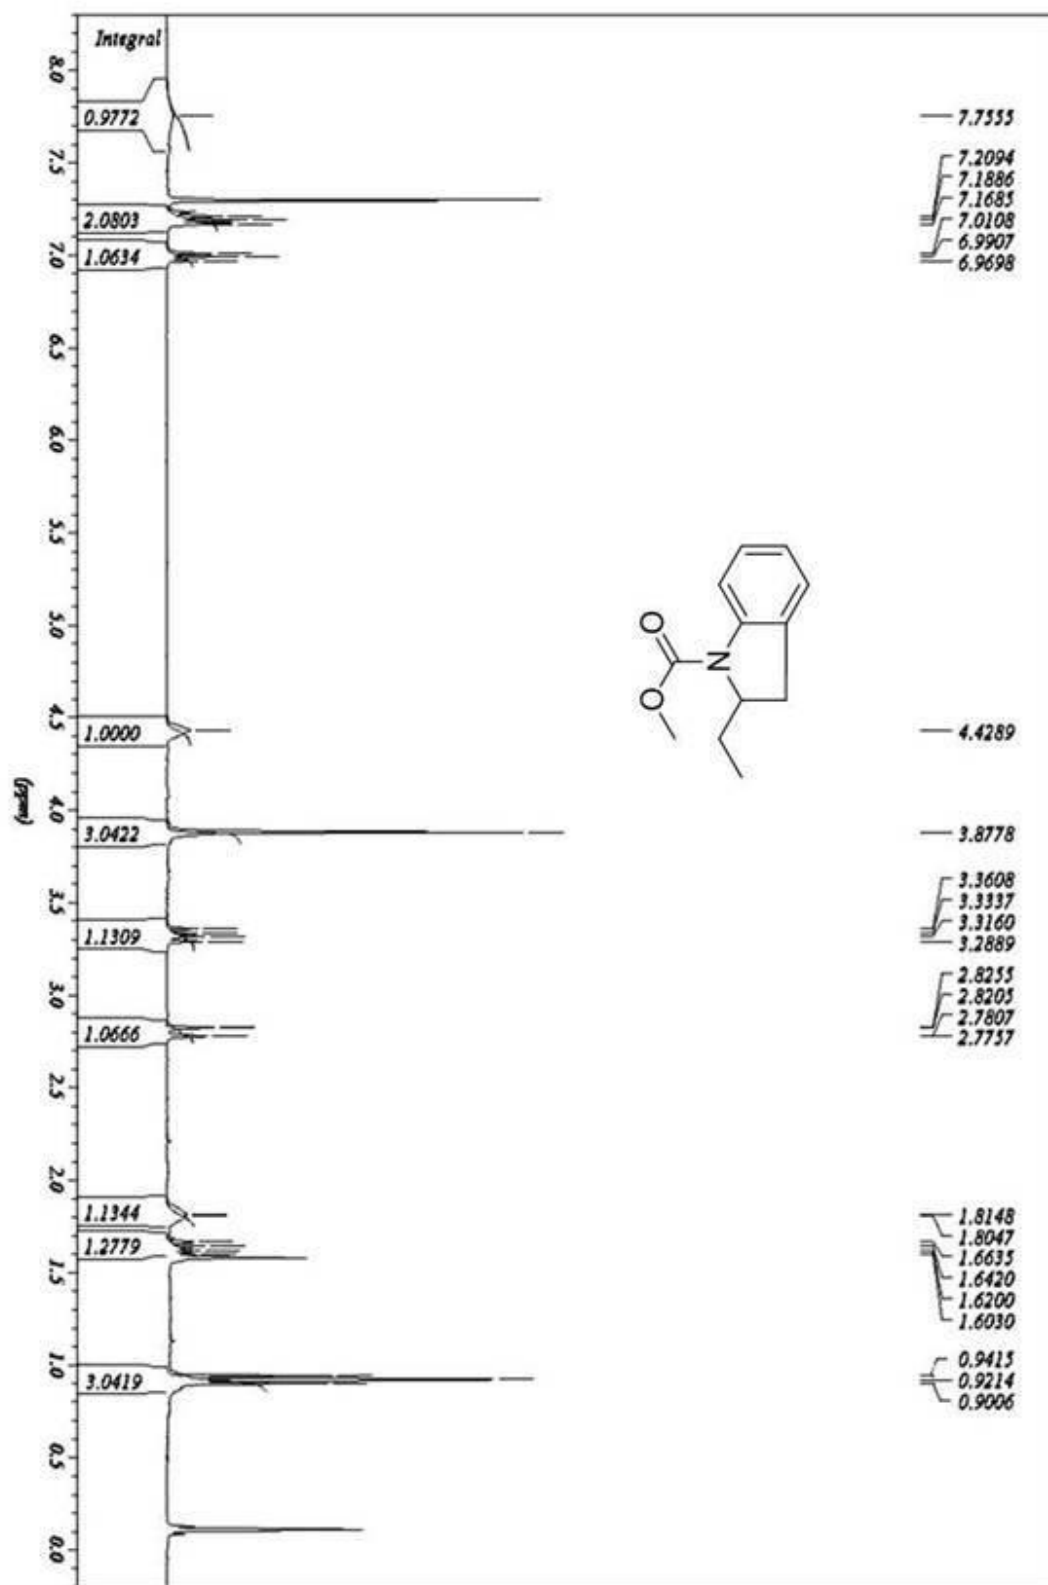

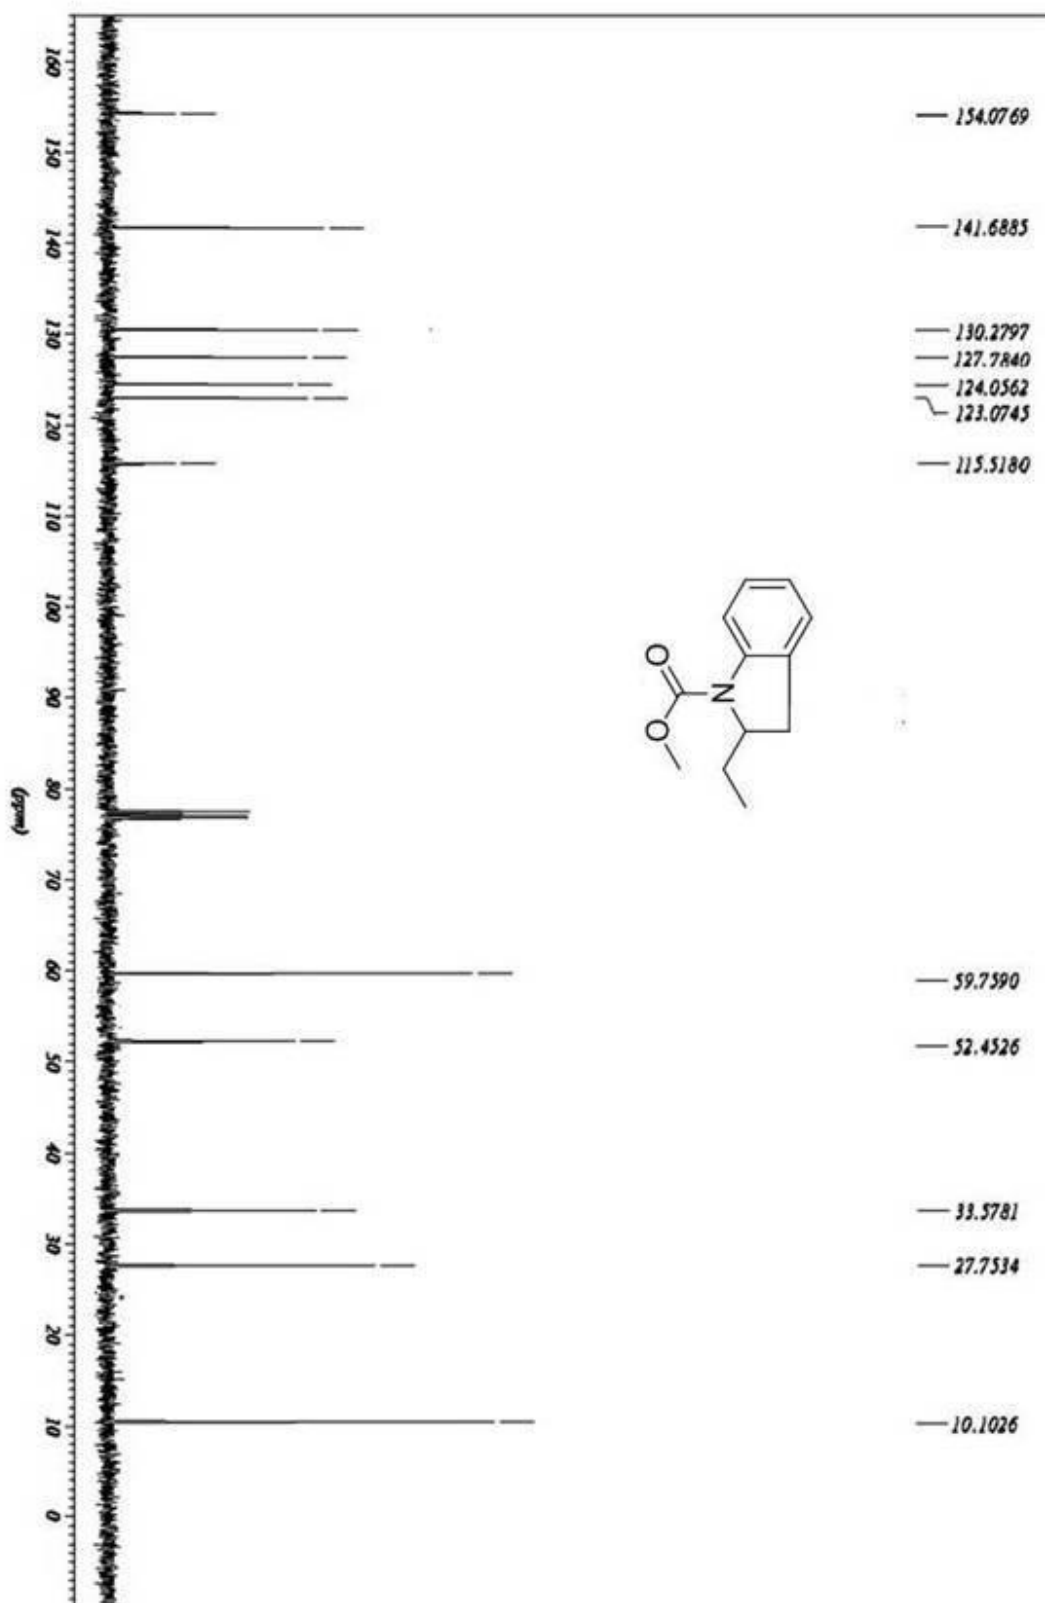

SAS-266-1 360MHz

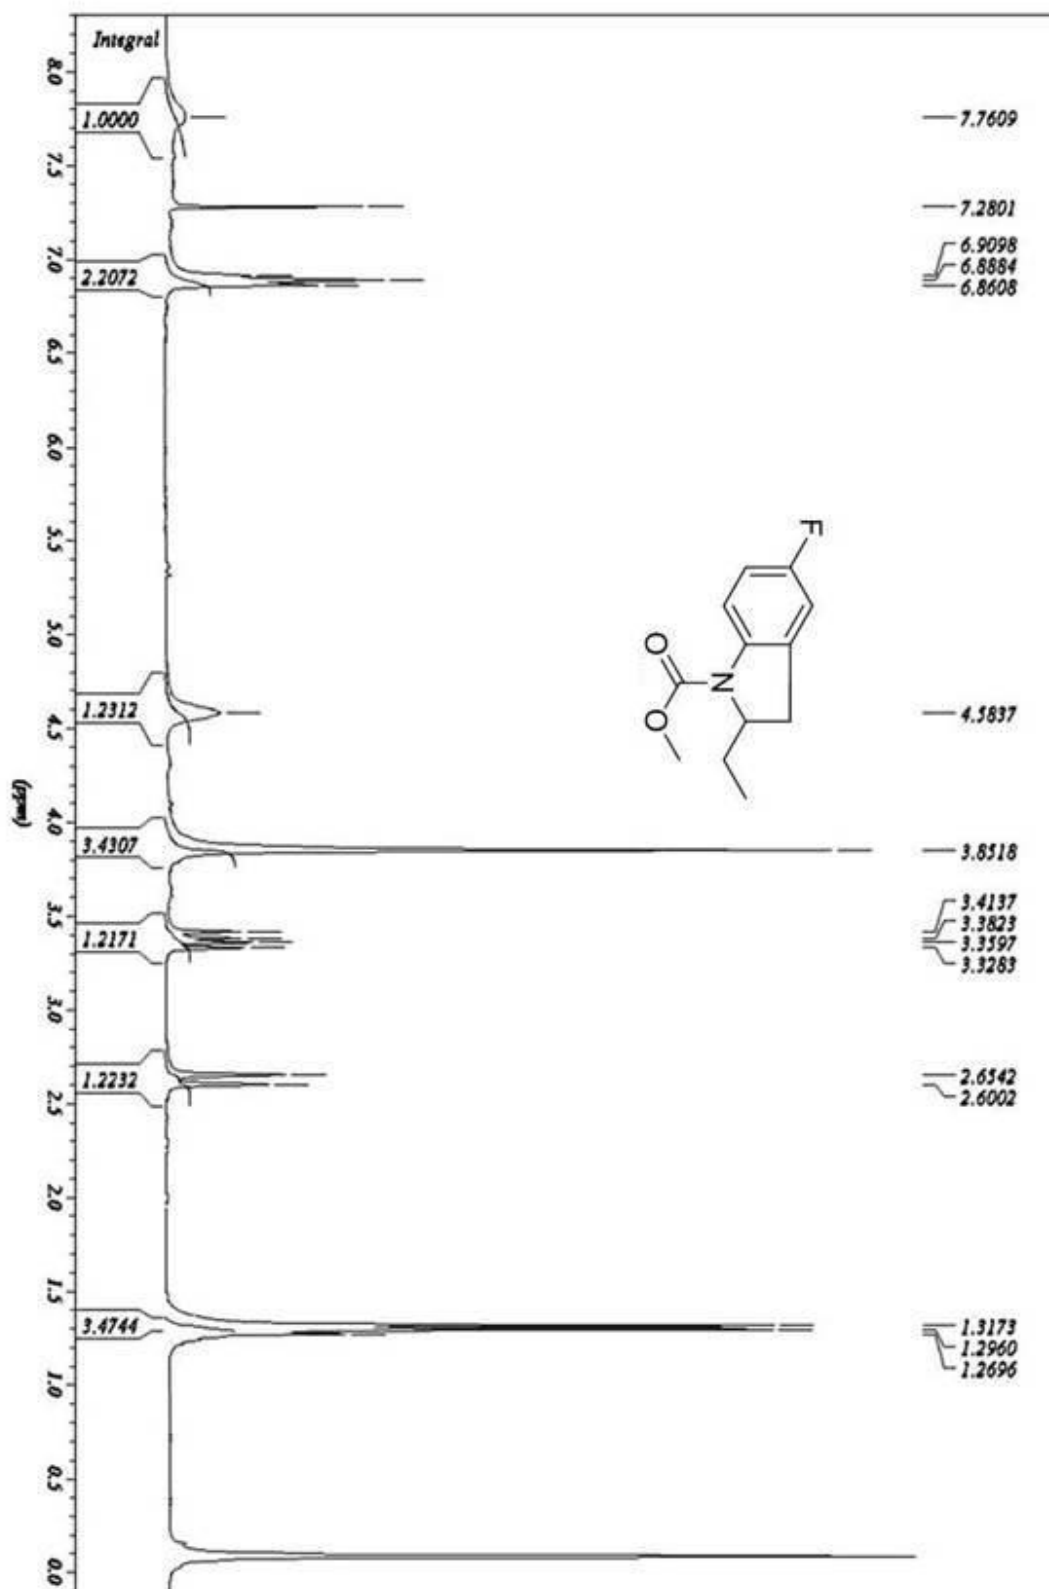

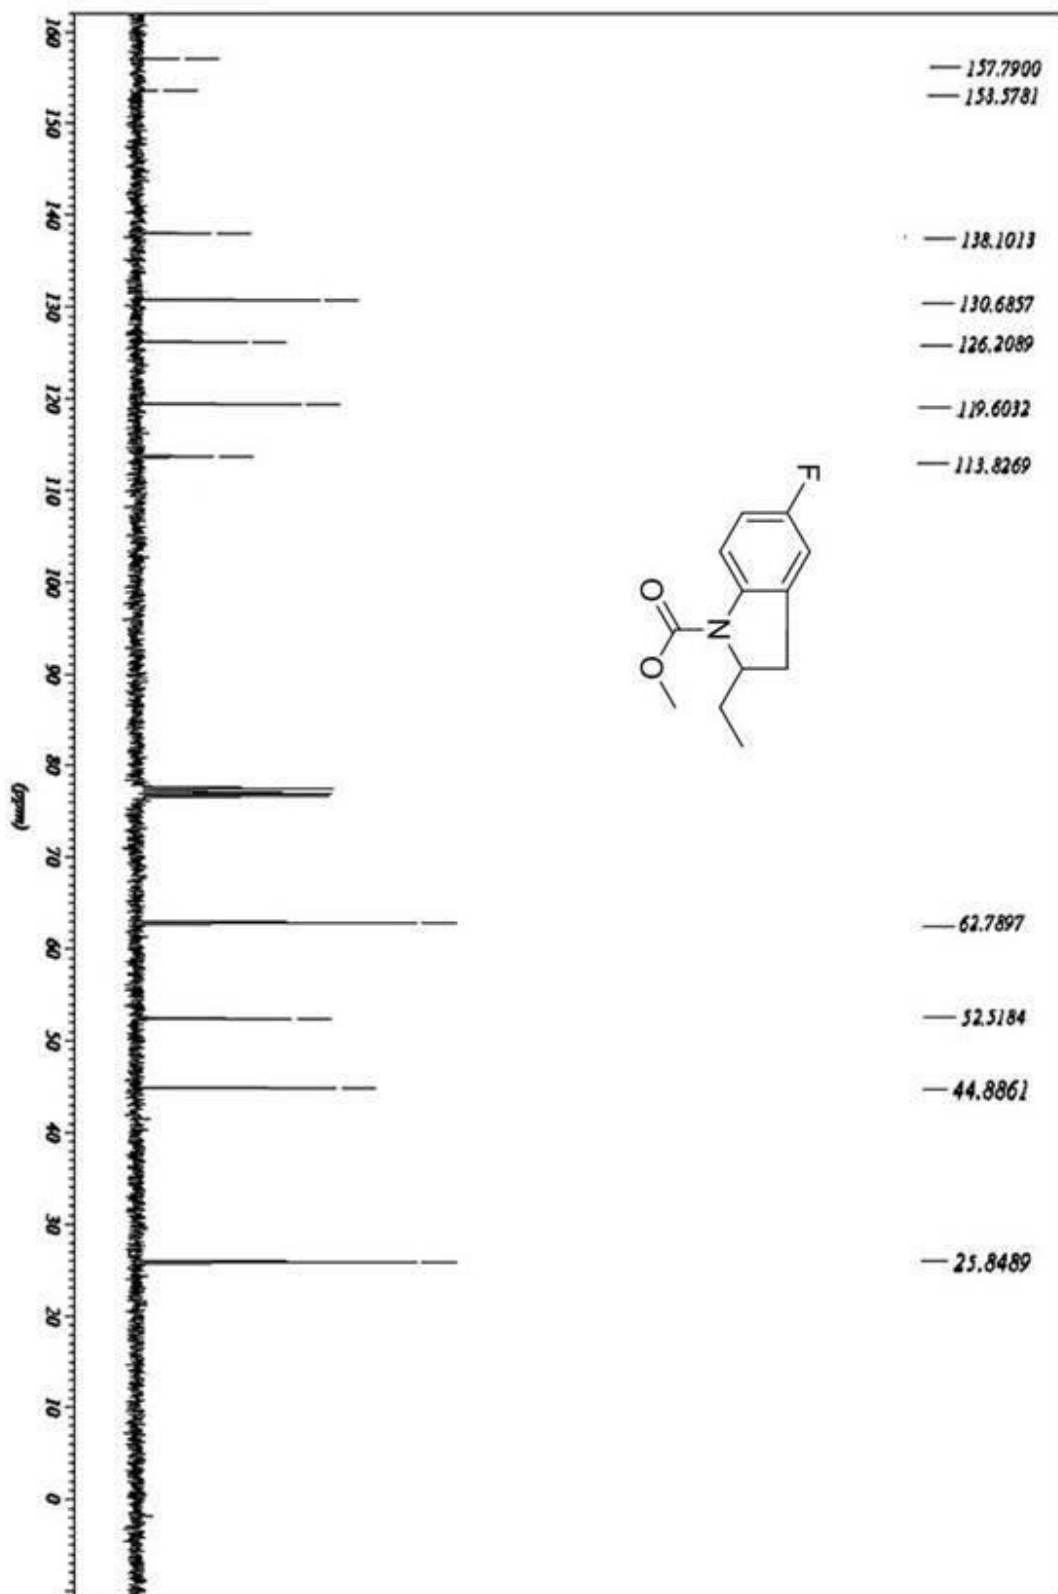

SAS-2

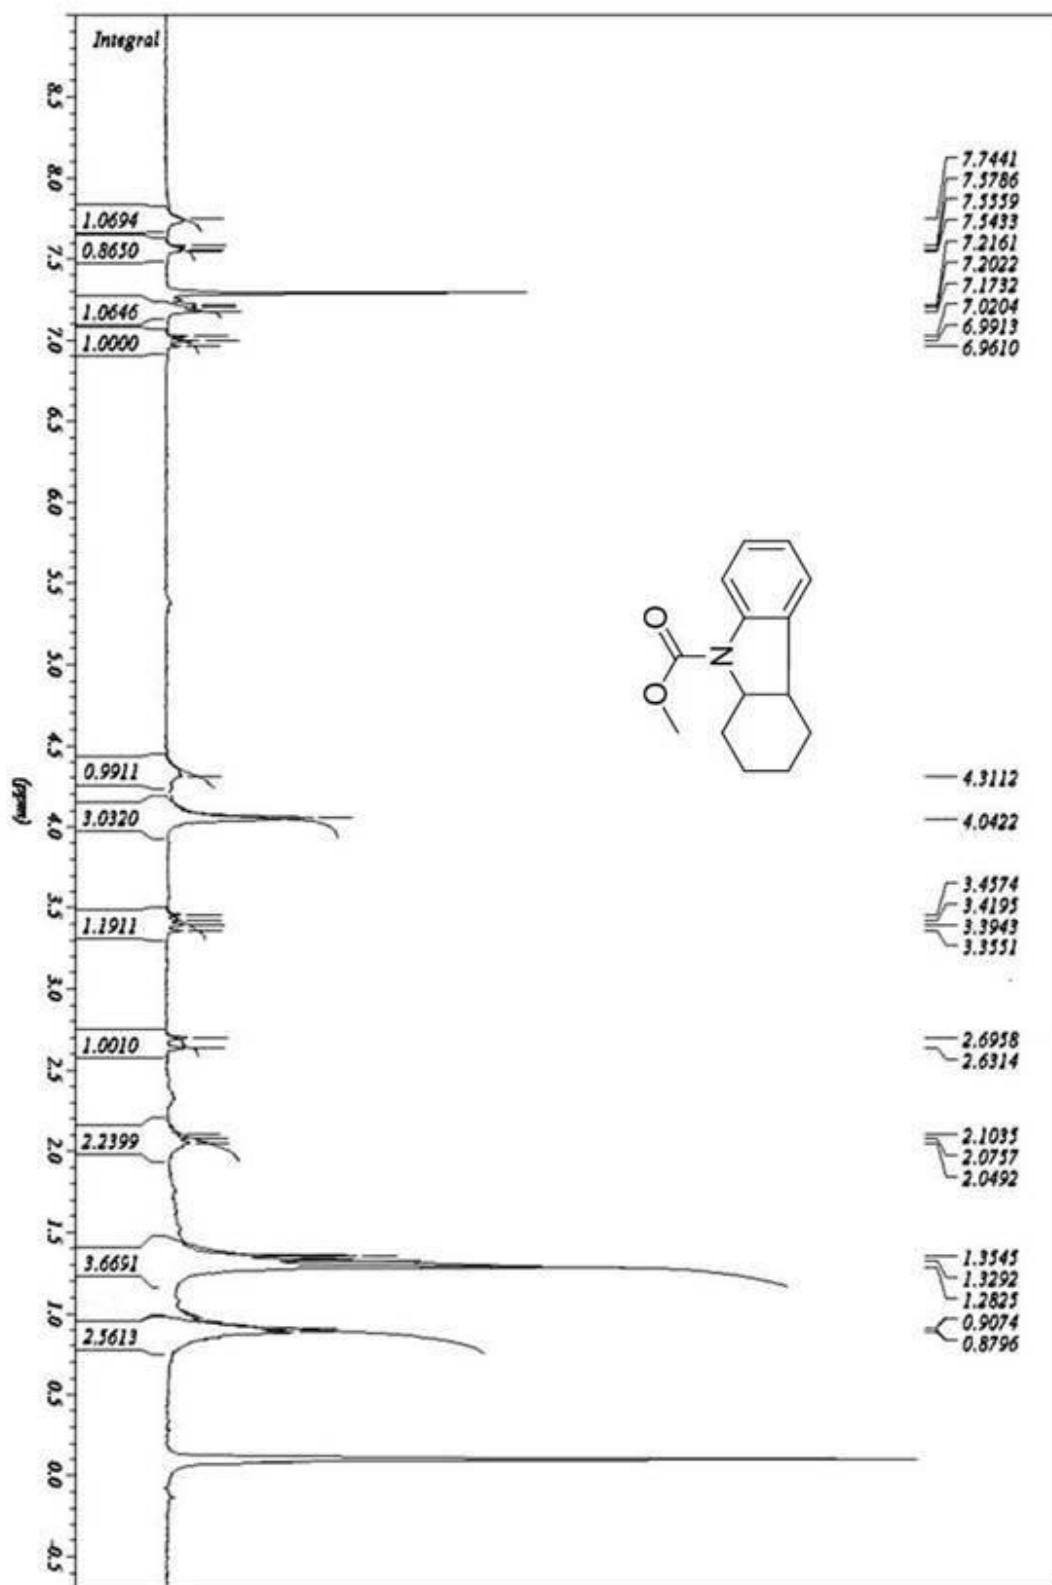



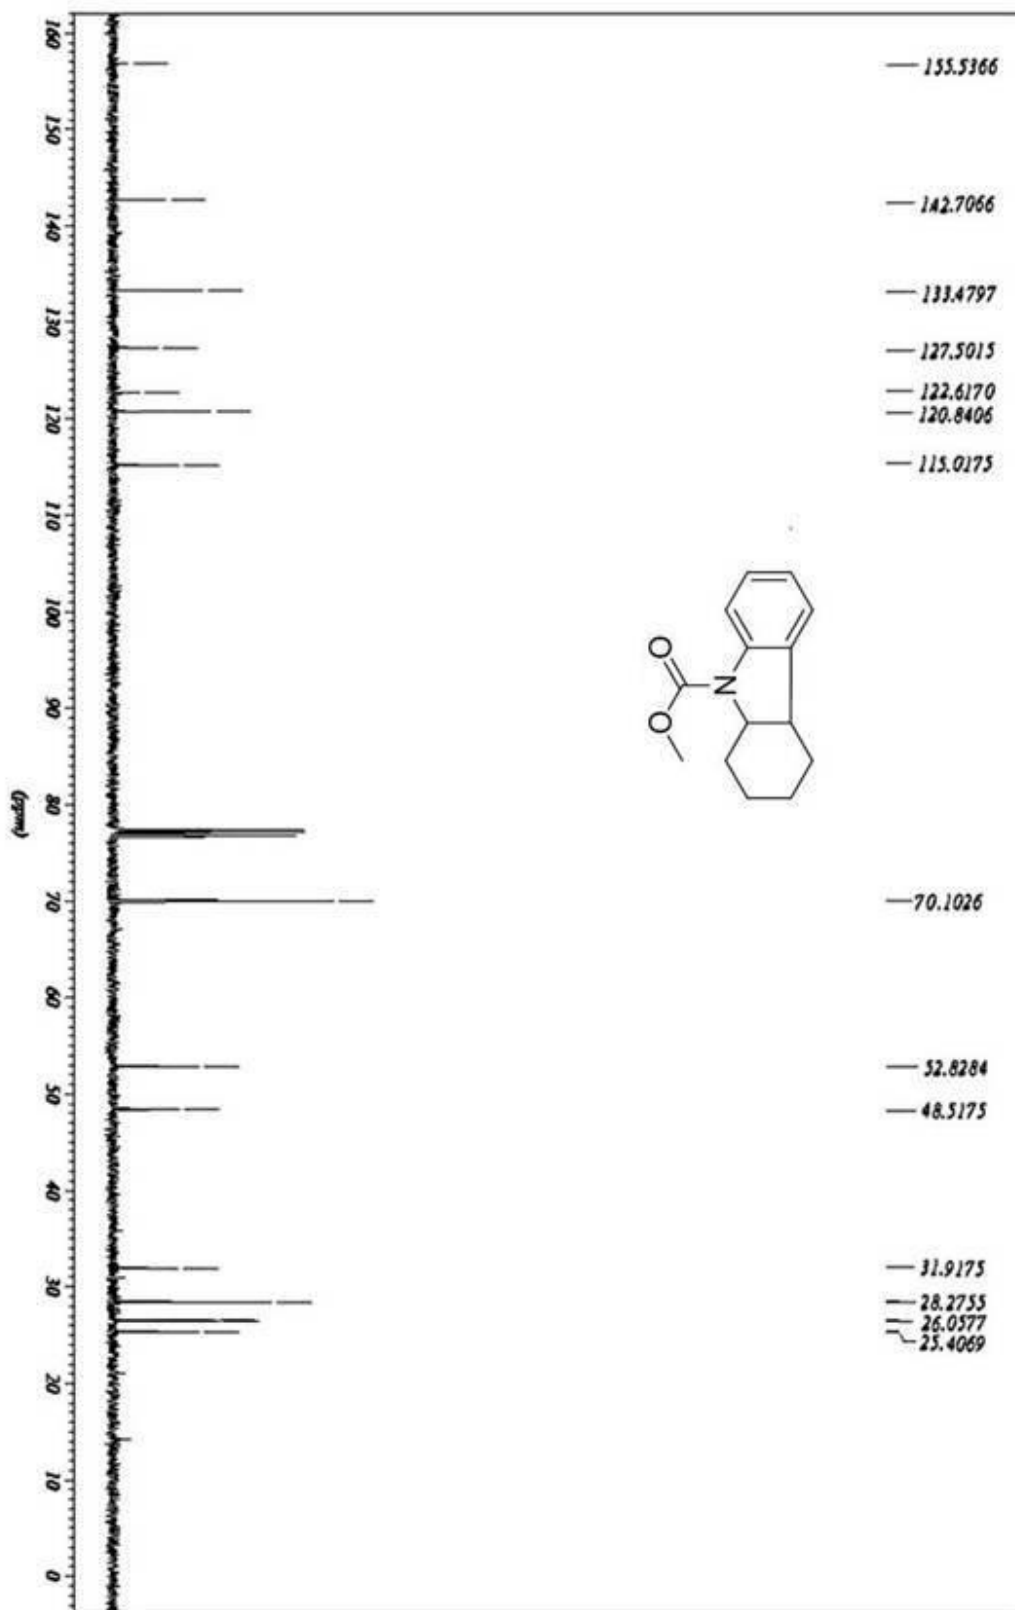

SAS-

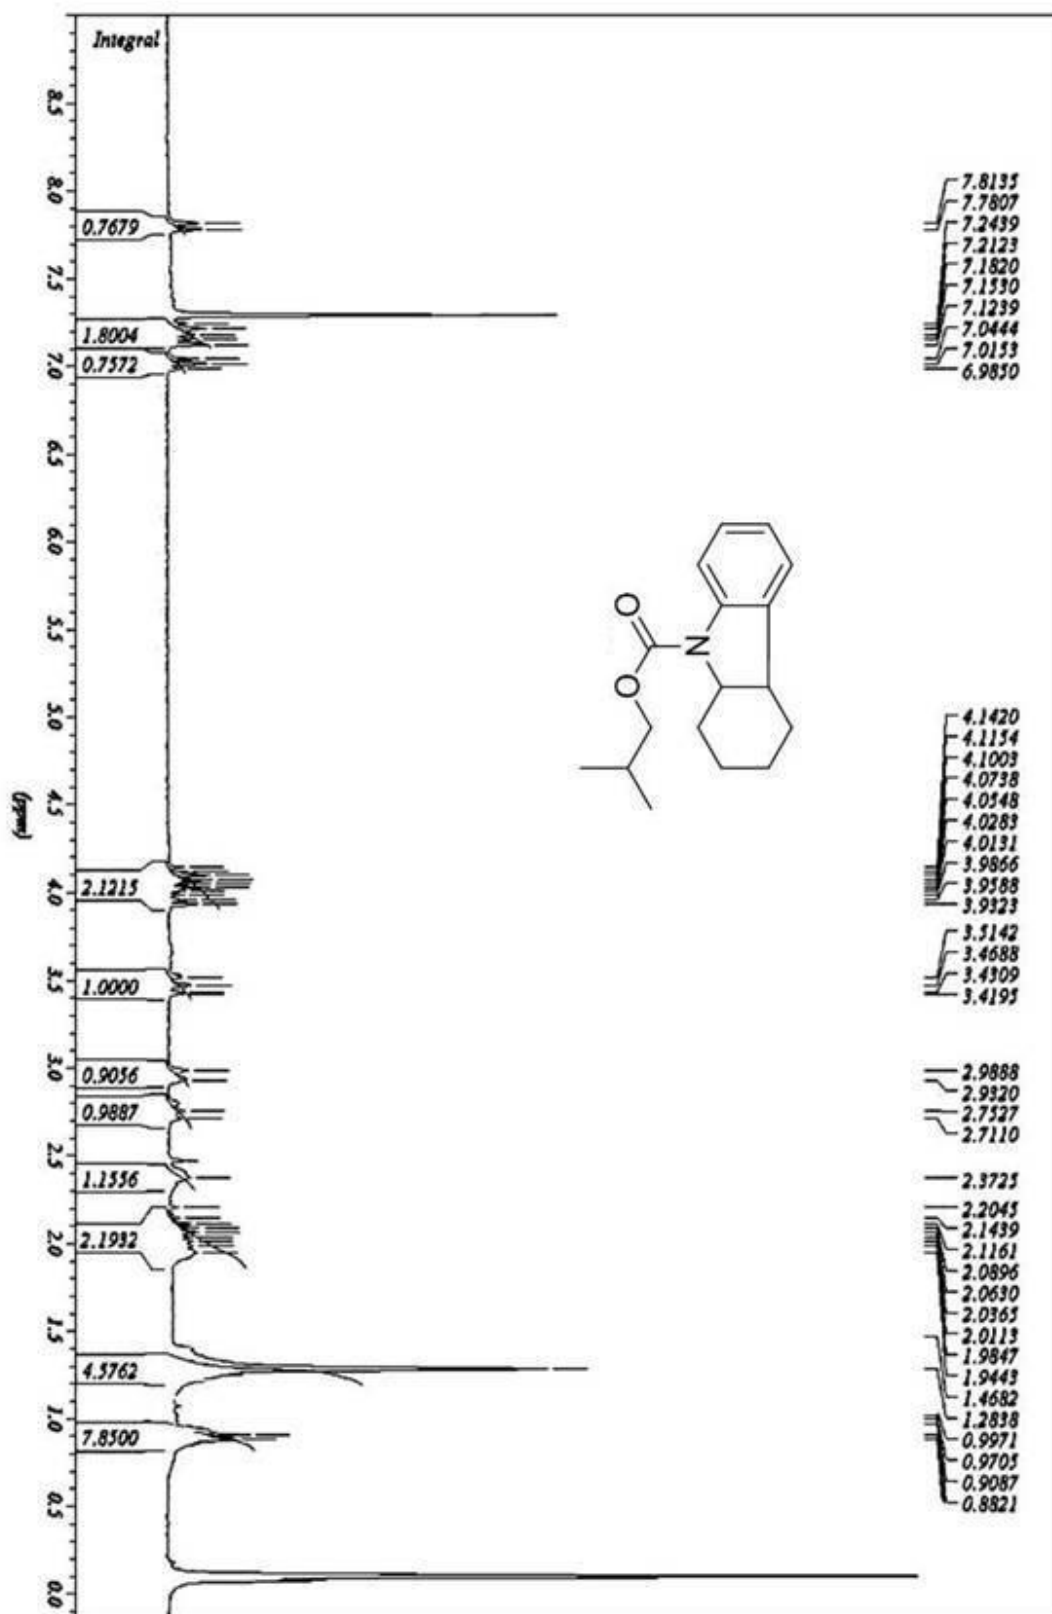

SAS-244-1

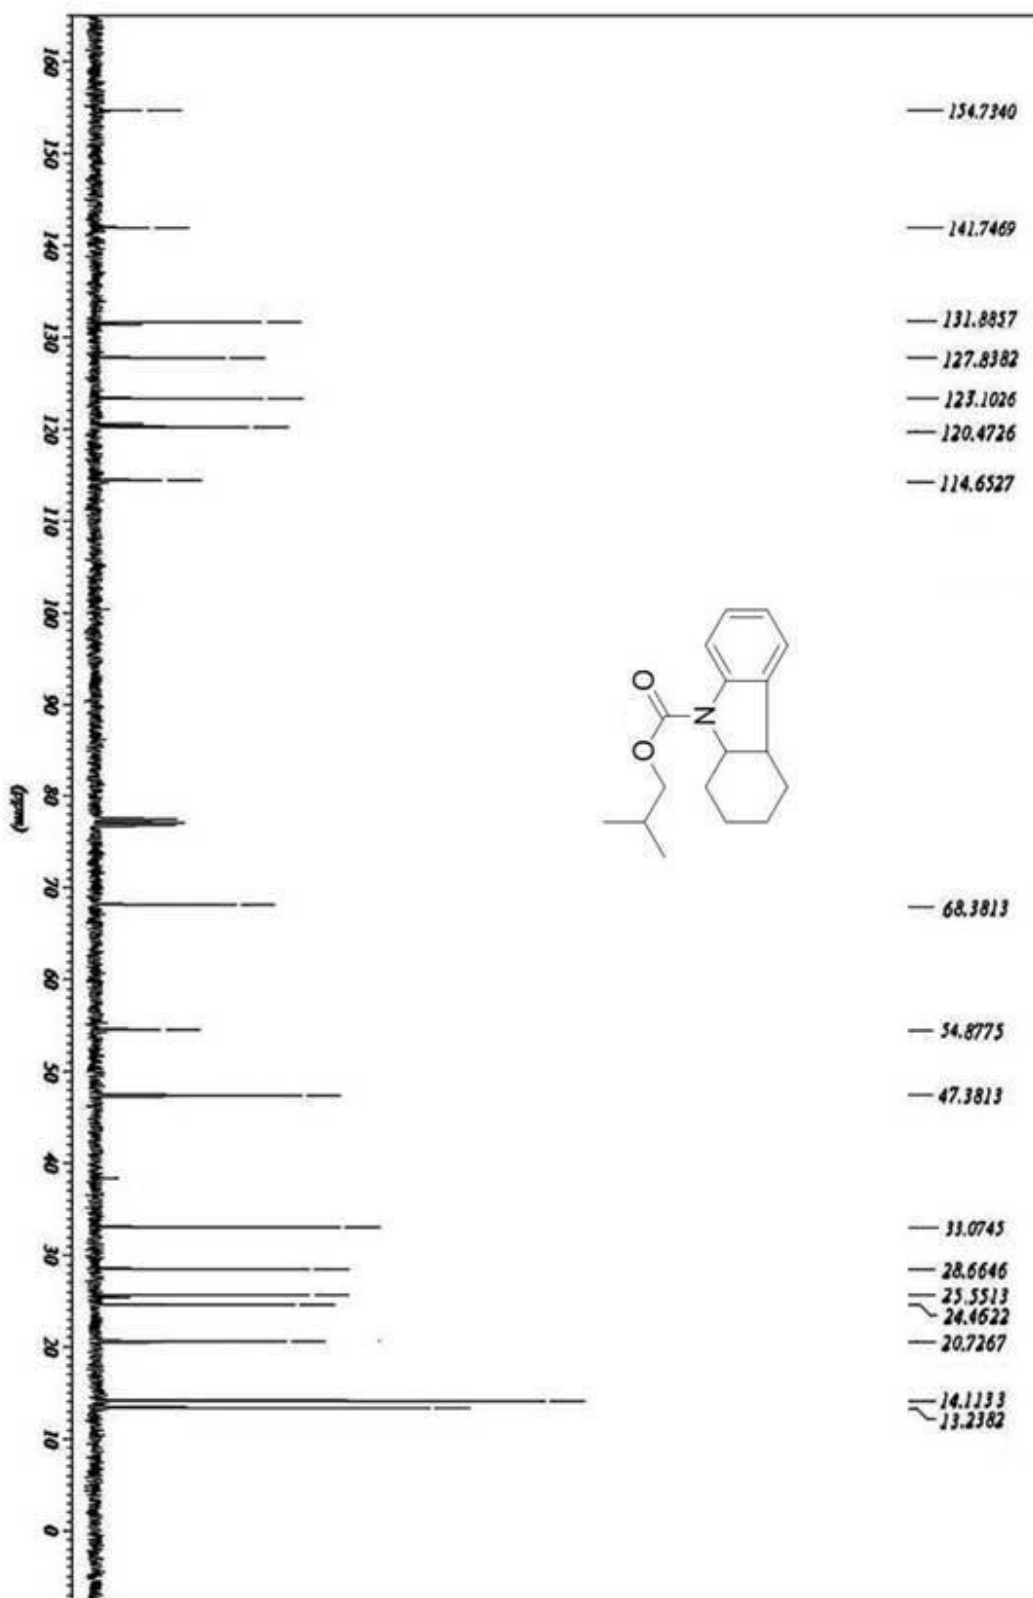

### Chromatogram for compound 2a

Column : OJ-H  
Solvent : Hex/<sup>i</sup>PrOH 99/1,  
Flow : 1 mL/min,  
Wavelength : 254 nm

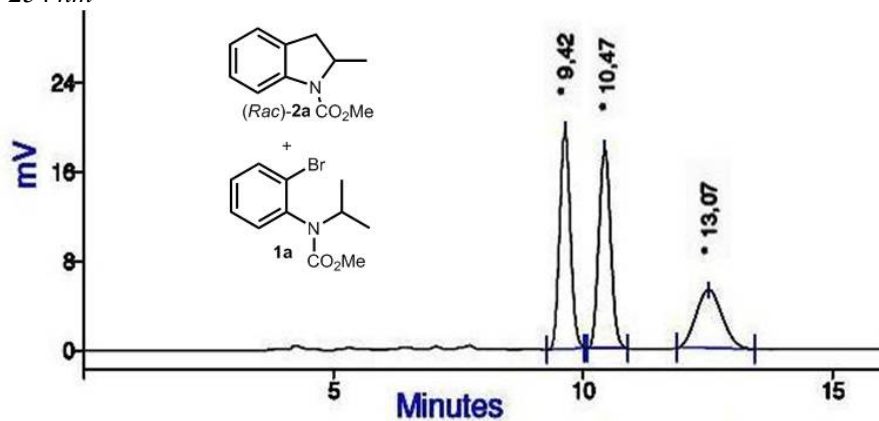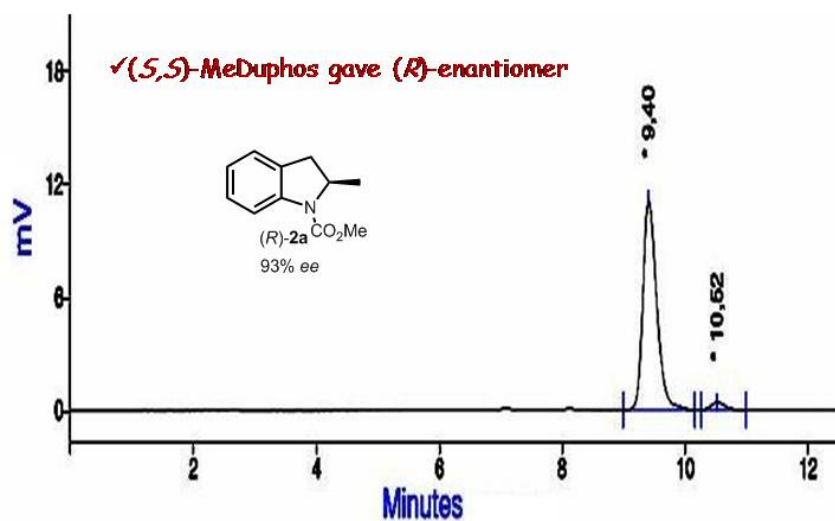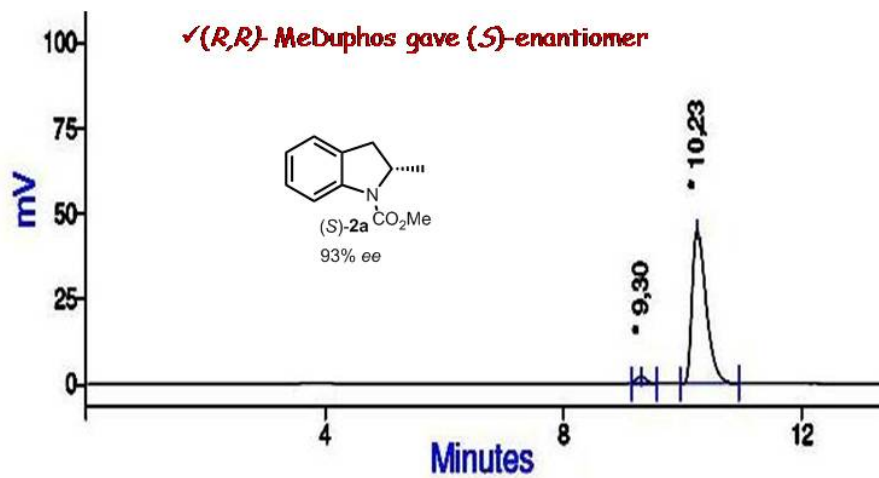

Supplement: c1cc14292e.pdf [file c1cc14292e.pdf]
